# Supplementary material for: Cardiovascular Risk in Adolescents With Congenital Heart Disease Living in a Low-income Region: Cross-sectional Associations With Clinical, Behavioral and Sociodemographic Factors
Source: Research Square preprint supplement (doi:10.21203/rs.3.rs-7705645/v1), 2025-12-02
Supplement: Supplementary file 1 [file fa94d68f555d5e69eebba36a.docx]

**SUPPLEMENTARY MATERIAL**

**Supplementary file 1.** Bivariate analyses of cardiovascular risk factors with sociodemographic, clinical and behavioral factors

|  | **Risk Factor** | **PDAY**  **intermediate to high** | | **Blood Pressure**  **High** | | **Waist Perimeter excessive** | | **Blood glucose**  **elevated** | | **Total Cholesterol**  **borderline to altered** | | **HDL-c**  **low** | | **LDL-c**  **borderline to altered** | | **Triglycerides**  **borderline to altered** | | |
| --- | --- | --- | --- | --- | --- | --- | --- | --- | --- | --- | --- | --- | --- | --- | --- | --- | --- | --- |
|  |  | **%** | **X2 / p-valor** | **%** | **X2 / p-valor** | **%** | **X2 / p-valor** | **%** | **X2 / p-valor** | **%** | **X2 / p-valor** | **%** | **X2 / p-valor** | **%** | **X2 / p-valor** | **%** | **X2 / p-valor** |
|  |  |  |  |  |  |  |  |  |  |  |  |  |  |  |  |  |  |
| **Age** | 10 a 14 years | 78,6 | 0,3602 (0,548) | 93,3 | 3,4539 (0,096)* | 75,0 | 0,0008 (1,000)* | 66,7 | 0,745 (1,000)* | 72,0 | 0,1410 (0,707) | 80,9 | 1,9938 (0,158) | 90,9 | 1,7979 (0,271*) | 81,5 | 1,0358 (0,309) |
|  | 15 a 18 years | 21,4 |  | 6,7 |  | 25,0 |  | 33,3 |  | 28,0 |  | 19,1) |  | 9,09 |  | 18,5 |  |
| **Sex** | Feminine | 39,2 | 5,9493 (0,015) | 60,0 | 0,0545 (0,815) | 75,0 | 1,8227 (0,216)* | 0,0 | 4,1992 (0,073)* | 68,0 | 1,7442 (0,187) | 50,0) | 2,0985 (0,147) | 63,6 | 0,2094 (0,647) | 55,6 | 0,0545 (0,815) |
|  | Masculine | 60,7 |  | 40,0 |  | 25,0 |  | 100,0 |  | 32,0 |  | 50,0) |  | 36,4 |  | 44,4 |  |
| **Income** | ≤ 1 Minimum wage | 50,0 | 0,0079 (0,929) | 46,7 | 0,1200 (0,729) | 50,0 | 0,0025 (0,960) | 66,6 | 0,3201 (1,000)* | 40,0 | 1,7070 (0,191) | 64,3) | 7,0832 (0,008) | 54,5 | 0,0776 (0,781) | 63,0 | 2,5519 (0,110) |
|  | >1 Minimum wage | 50,0 |  | 53,3 |  | 50,0 |  | 33,3 |  | 60,0 |  | 35,7) |  | 45,4 |  | 37,0 |  |
| **Education of the person in charge** | <10 years | 50,0 | 0,1995 (0,655) | 46,7 | 0,3348 (0,563) | 50,0 | 0,0638 (0,801) | 100,0 | 2,7344 (0,243)* | 64,0 | 1,7143 (0,190) | 61,9) | 2,8177 (0,093 | 45,4 | 0,3215 (0,571 | 51,8 | 0,0372 (0,847) |
|  | >10 years | 50,0 |  | 53,3 |  | 50,0 |  | 0,0 |  | 36,0 |  | 38,1) |  | 54,5 |  | 48,1 |  |
| **Location** | Capital | 53,5 | 0,8559 (0,355) | 46,7 | 0,0000 (1,000) | 50,0 | 0,0638 (0,801) | 100,0 | 3,5714 (0,097)* | 36,0 | 1,7143 (0,190) | 48,4) | 1,4697 (0,225) | 27,3 | 1,9481 (0,163) | 37,0 | 1,5718 (0,210) |
|  | Other Locations | 46,4 |  | 53,3 |  | 50,0 |  | 0,0 |  | 64,0 |  | 59,5) |  | 72,7 |  | 63,0 |  |
| **Complexity of Heart Disease** | Simple | 46,4 | 2,7597 (0,097) | 60,0 | 0,0137 (0,907) | 50,0 | 0,4425 (0,506) | 33,3 | 0,8271 (0,566)* | 52,0 | 0,6873 (0,407) | 57,1) | 0,0914 (0,762) | 27,3 | 5,2393 (0,022) | 55,6 | 0,1684 (0,682) |
|  | Moderate/Complex | 53,5 |  | 40,0 |  | 50,0 |  | 66,7 |  | 48,0 |  | 42,8) |  | 72,7 |  | 44,4 |  |
| **Heart disease** | Cyanotic | 8,5 | 0,0923 (0,761) | 20,0 | 1,0033 (0,369)* | 50,0 | 2,5113 (0,113) | 33,3 | 0,0105 (1,000)* | 24,0 | 0,7839 (0,376) | 33,3) | 0,3192 (0,572) | 36,4 | 0,1968 (0,657) | 29,6 | 0,0213 (0,884) |
|  | Acyanotic | 71,4 |  | 80,0 |  | 50,0 |  | 66,7 |  | 76,0 |  | 66,7) |  | 63,6 |  | 70,4 |  |
| **Number of Surgeries** | None | 9,2 | 3,5426 (0,060) | 46,7 | 0,5540 (0,758) | 41,7 | 0,8207 (0,617)* | 100,0 | 2,7344 (0,403)* | 48,0 | 0,4330 (0,805) | 57,1) | 0,6198 (0,734) | 54,5 | 2,1694 (0,338) | 48,1 | 0,6629 (0,718) |
|  | More than 1 | 60,7 |  | 53,3 |  | 59,3 |  | 0,0 |  | 52,0 |  | 42,86) |  | 45,4 |  | 51,8 |  |
| **Physical Activity** | Insufficiently | 82,1 | 3,8362 (0,095)* | 80,0 | 2,5210 (0,138)* | 91,7 | 0,0169 (1,000)* | 100,0 | 0,3217 (1,000)* | 96,0 | 1,2605 (0,262) | 88,1) | 0,7459 (0,388) | 90,9 | 0,0009 (0,976) | 88,9 | 0,1576 (0,691) |
|  | **Active** | 17,9 |  | 20,0 |  | 8,3 |  | 0,0 |  | 4,0 |  | 11,9) |  | 9,0 |  | 11,1 |  |
| **Sedentary Behavior** | Normal | 7,1 | 3,2382 (0,114)* | 6,7 | 1,4888 (0,445)* | 25,0 | 0,5860 (0,426)* | 0,0 | 0,6552 (1,000)* | 16,0 | 0,0465 (0,829) | 16,67) | 0,0296 (0,863) | 0,0 | 2,7029 (0,100) | 81,4 | 0,0414 (0,839) |
|  | Excess | 92,9 |  | 93,3 |  | 75,0 |  | 100,0 |  | 84,0 |  | 83,3) |  | 100,0 |  | 18,5 |  |

PDAY: *Pathobiological Determinants of Atherosclerosis in Youth*; HDL: *High Density Lipoprotein*; LDL: *Low Density Lipoprotein; p-valor: 0,05*

**Supplementary file 2.** MHDI of the municipalities of the research participants.

| MUNICIPALITY | MHDI |
| --- | --- |
| Anadia | 0,568 |
| Arapiraca | 0,649 |
| Atalaia | 0,561 |
| Boca da Mata | 0,604 |
| Campo Alegre | 0,570 |
| Campo Grande | 0,524 |
| Delmiro Gouveia | 0,612 |
| Estrela de Alagoas | 0,534 |
| Feira Grande | 0,533 |
| Girau do Ponciano | 0,536 |
| Traipu | 0,532 |
| Jacaré dos Homens | 0,583 |
| Limoeiro da Anadia | 0,580 |
| Maribondo | 0,597 |
| Mata Grande: | 0,504 |
| Murici | 0,527 |
| Olho d'água das flores | 0,565 |
| Palmeira dos Índios | 0,638 |
| Pariconha | 0,548 |
| Penedo | 0,630 |
| Piranhas: | 0,589 |
| Rio Largo | 0,643 |
| Roteiro | 0,505 |
| Santa Luzia do Norte | 0,597 |
| São Miguel dos Campos | 0,623 |

**Supplementary file 3.** Logistic regression of clinical, behavioral and sociodemographic factors associated with RCV.

| **Variable** | **PDAY** | | | **Blood Pressure** | | | **Waist Perimeter** | | | **Blood glucose** | | |
| --- | --- | --- | --- | --- | --- | --- | --- | --- | --- | --- | --- | --- |
|  | **OR** | **CI** | **p-valor** | **OR** | **CI** | **p-valor** | **OR** | **CI** | **p-valor** | **OR** | **CI** | **p-valor** |
| **Age** | - | - | - | 0,206 | 0,0243157- 1,753135 | 0,148 |  |  |  | 1,481 | 0,8229753-2,667672 | 0,190 |
| **Sex** | 0,315 | 0,1093633- 0,9116655 | **0,033** | - |  | - | 2,695 | 0,6428667-11,30582 | 0,175 | - | - |  |
| **Income** | - | - | - | - | **-** | - | - | - | - | 0,343 | 0,0250849-4,696082 | 0,423 |
| **Education of the person in charge** | - | - | - | 1,491 | 0,4528662-4,910503 | 0,511 | - | - | - | - | - |  |
| **Location** | - | - | - | - | - | - | - | - | - | - | - |  |
| **Complexity of Heart Disease** | - | - | - | - | - | - | 1,706 | 0,4285013-6,794342 | 0,449 | 4,969 | 0,3475836-71,04537 | 0,237 |
| **Heart disease** | - | - | - | - | - | - | 2,487 | 0,6662499-9,290121 | 0,175 | 0,636 | 0,0435796-9,282815 | 0,741 |
| **Number of Surgeries** | 1,962 | 0,9655683-3,990128 | 0,062 | - | - | - | - | - | - | - | - |  |
| **Physical Activity** | 4,235 | 0,5672237-31,62704 | 0,159 | 3,410 | 0,6265548-18,56048 | 0,156 | - | - | - | - | - |  |
| **Sedentary Behavior** | 0,293 | 0,0559415 – 1,802605 | 0,147 | 0,375 | 0,0391179-3,59714 | 0,395 | 1,628 | 0,0102398-0,248067 | 0,556 | - | - |  |
|  | **Colesterol Total** | | | **HDL-c** | | | **LDL-c** | | | **Triglycerides** | | |
|  | **OR** | **CI** | **P-valor** | **OR** | **CI** | **P-valor** | **OR** | **CI** | **P-valor** | **OR** | **CI** | **P-valor** |
| **Age** | - | - | - | 2,586 | 0,8034625-8,324702 | 0,111 | 0,273 | 0,0305876-2,437589 | 0,245 | 0,555 | 0,1709513-1,806576 | 0,329 |
| **Sex** | - | **-** |  | 2,710 | 0,9164247-8,01752 | 0,072 | - | - | - | - | - | - |
| **Income** | 2,677 | 0,9232099-7,763755 | 0,070 | 3,295 | 1,196808-9,076461 | **0,021** | - | - | - | 0,416 | 0,1525468-1,137216 | 0,087 |
| **Education of the person in charge** | 0,428 | 0,1509438-1,21752 | 0,112 | - | - | - | - | - | - | - | - | - |
| **Location** | 2,462 | 0,8547289 7,093235 | 0,095 | 0,534 | 0,1861191-1,537359 | 0,245 | 2,651 | 0,6064369-11,59149 | 0,195 | - | - | - |
| **Complexity of Heart Disease** | - | - | - | - | - | - | 4,377 | 1,025131-18,68946 | **0,046** | - | - | - |
| **Heart disease** | - | - | - | - | - | - | - | - | - | - | - | - |
| **Number of Surgeries** | - | - | - | - | - | - | - | - | - | 1,462 | 0,7442162-2,873775 | 0,270 |
| **Physical Activity** | - | - | - | - | - | - | - | - | - | - | - | - |
| **Sedentary Behavior** | - | - | - | - | - | - |  |  |  |  |  |  |

*PDAY: Pathobiological Determinants of Atherosclerosis in Youth; HDL: High Density Lipoprotein; LDL: Low Density Lipoprotein.; OR: Odds Ratio; p-valor: 0,05; CI: Confidence interval..*

**Supplementary file 4.** STROBE— Checklist of items to be included in reports of cross-sectional studies

|  | **Item No** | **Article Page** | **Recommendation** |
| --- | --- | --- | --- |
| **Title and abstract** | 1 | **47/48** | (*a*) Indicate the study’s design with a commonly used term in the title or the abstract |
| **49** | (*b*) Provide in the abstract an informative and balanced summary of what was done and what was found |
| **Introduction** |  |  |  |
| Background/rationale | 2 | **50** | Explain the scientific background and rationale for the investigation being reported |
| Objectives | 3 | **51** | State specific objectives, including any prespecified hypotheses |
| **Methods** |  |  |  |
| Study design | 4 | **51** | Present key elements of study design early in the paper |
| Setting | 5 | **51** | Describe the setting, locations, and relevant dates, including periods of recruitment, exposure, follow-up, and data collection |
| Participants | 6 | **52** | (*a*) Give the eligibility criteria, and the sources and methods of selection of participants |
| Variables | 7 | **52** | Clearly define all outcomes, exposures, predictors, potential confounders, and effect modifiers. Give diagnostic criteria, if applicable |
| Data sources/ measurement | 8* | ***52-56*** | For each variable of interest, give sources of data and details of methods of assessment (measurement). Describe comparability of assessment methods if there is more than one group |
| Bias | 9 | **56** | Describe any efforts to address potential sources of bias |
| Study size | 10 | **56** | Explain how the study size was arrived at |
| Quantitative variables | 11 | **56** | Explain how quantitative variables were handled in the analyses. If applicable, describe which groupings were chosen and why |
| Statistical methods | 12 | **57** | (*a*) Describe all statistical methods, including those used to control for confounding |
| (*b*) Describe any methods used to examine subgroups and interactions |
| (*c*) Explain how missing data were addressed |
| (*d*) If applicable, describe analytical methods taking account of sampling strategy |
| (*e*) Describe any sensitivity analyses |
| **Results** |  |  |  |
| Participants | 13* | **58** | (a) Report numbers of individuals at each stage of study—eg numbers potentially eligible, examined for eligibility, confirmed eligible, included in the study, completing follow-up, and analysed |
| (b) Give reasons for non-participation at each stage |
| (c) Consider use of a flow diagram |
| Descriptive data | 14* | **57-59** | (a) Give characteristics of study participants (eg demographic, clinical, social) and information on exposures and potential confounders |
| (b) Indicate number of participants with missing data for each variable of interest |
| Outcome data | 15* | **58** | Report numbers of outcome events or summary measures |
| Main results | 16 | **58** | (*a*) Give unadjusted estimates and, if applicable, confounder-adjusted estimates and their precision (eg, 95% confidence interval). Make clear which Report numbers of outcome events or summary measures confounders were adjusted for and why they were included |
| (*b*) Report category boundaries when continuous variables were categorized |
| (*c*) If relevant, consider translating estimates of relative risk into absolute risk for a meaningful time period |
| Other analyses | 17 | **62** | Report other analyses done—eg analyses of subgroups and interactions, and sensitivity analyses |
| **Discussion** |  |  |  |
| Key results | 18 | **64** | Summarise key results with reference to study objectives |
| Limitations | 19 | **68** | Discuss limitations of the study, taking into account sources of potential bias or imprecision. Discuss both direction and magnitude of any potential bias |
| Interpretation | 20 | **68** | Give a cautious overall interpretation of results considering objectives, limitations, multiplicity of analyses, results from similar studies, and other relevant evidence |
| Generalisability | 21 | **68** | Discuss the generalisability (external validity) of the study results |
| **Other information** |  |  |  |
| Funding | 22 | **68** | Give the source of funding and the role of the funders for the present study and, if applicable, for the original study on which the present article is based |

**Supplementary file 5.** Cutoff point Individuals who were fasting and Withot fasting

| **Cutoff point individuals who were fasting** | |
| --- | --- |
| HDL | Low <40 mg/dl  Desirable 40-59 mg/dl. |
| LDL | Desirable <100 mg/dl,  Borderline 100-129 mg/dl,  High >130 mg/dl or more. |
| Total Cholesterol | Desirable <170 mg/dl  Borderline 170-199 mg/dl,  High 200 mg/dl or more. |
| Blood Glucose | Normal: <100 mg/dl  Altered >100 mg/dl |
| Triglycerides | Desirable (<90 mg/dL)  Borderline (90-129 mg/dL)  High (≥130 mg/dL) |
| **Cutoff point individuals without fasting** | |
| HDL | Low <45 mg/dl  Desirable 45 mg/dl |
| LDL | Desirable < 110 mg/dl |
| Total Cholesterol | Desirable <170 mg/dl |
| Blood Glucose | Normal: <140 mg/dl  Altered >140 |
| Triglycerides | < 175 mg/dL |

**Supplementary Figure 1.** Physical activity levels and sedentary behavior of adolescents with congenital heart disease in Maceió-AL
